# Supplementary material for: Intratumor heterogeneity comparison among different subtypes of non-small-cell lung cancer through multi-region tissue and matched ctDNA sequencing
Source: PubMed Central journal article supplement (PMC6325778; doi:10.1186/s12943-019-0939-9), 2019-01-09
Supplement: 12943_2019_939_MOESM4_ESM.pdf [file 12943_2019_939_MOESM4_ESM.pdf]

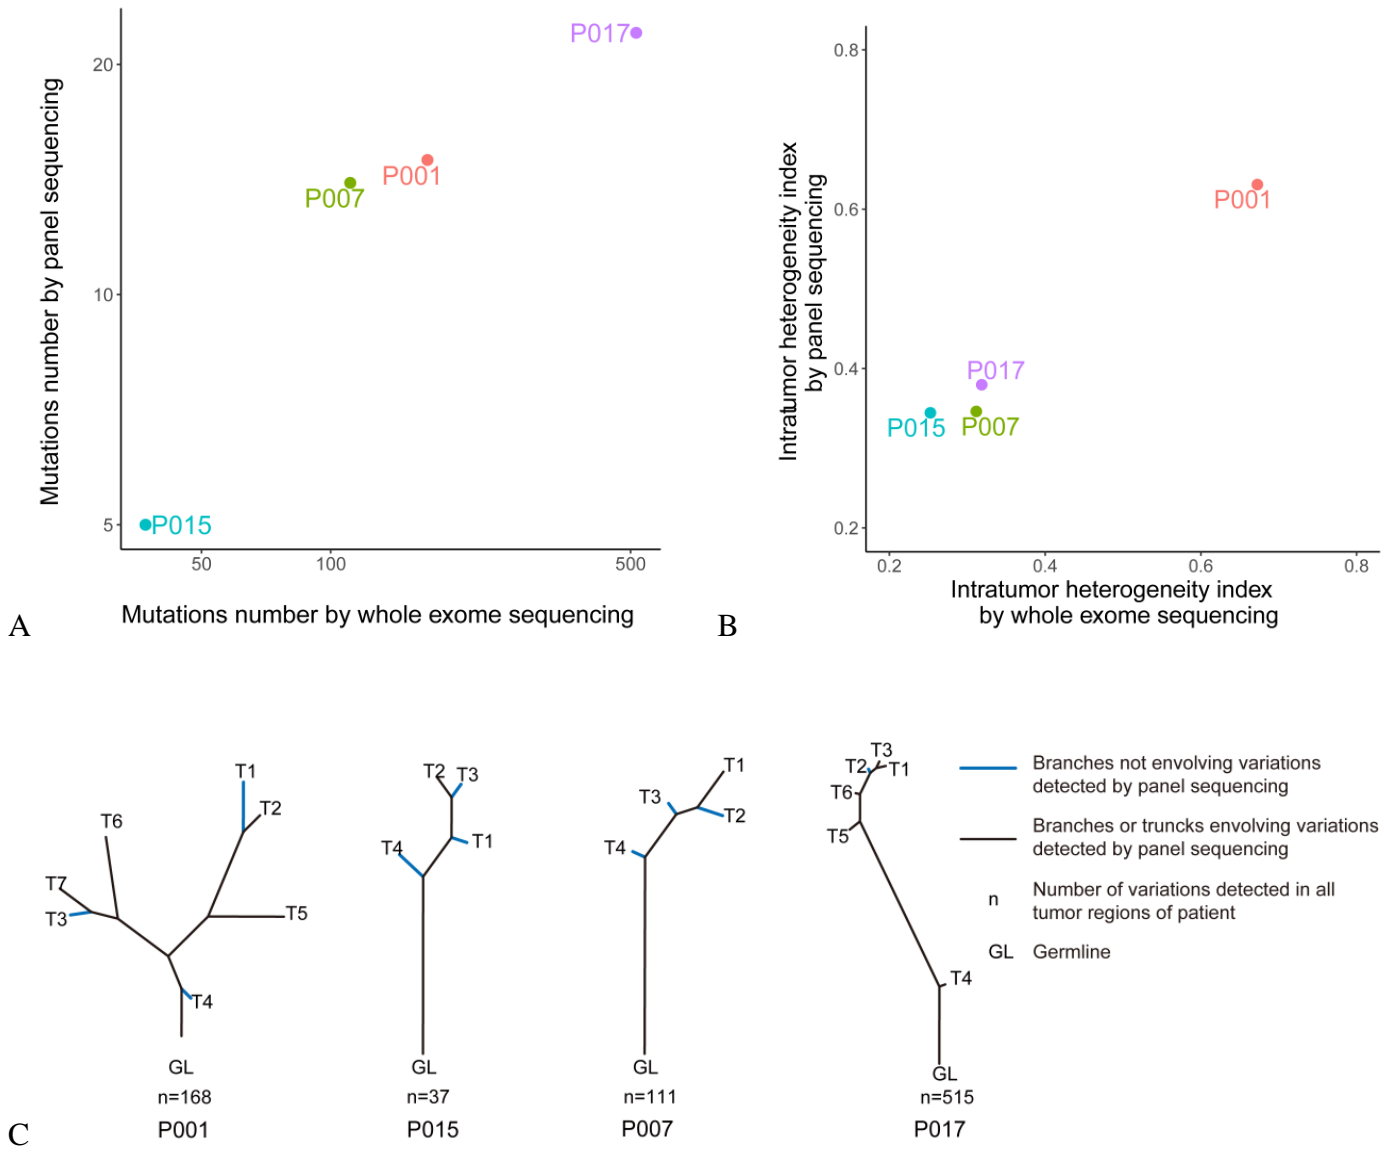

**Figure S2. The consistency of mutation numbers, ITH and phylogenetic trees between panel sequencing and WES in 4 randomly selected patients.**

(A) mutation numbers, (B) ITH, (C) phylogenetic trees

Abbreviations: ITH, intratumor heterogeneity; WES, whole exome sequencing
