# Supplementary material for: Intratumor heterogeneity comparison among different subtypes of non-small-cell lung cancer through multi-region tissue and matched ctDNA sequencing
Source: PubMed Central journal article supplement (PMC6325778; doi:10.1186/s12943-019-0939-9), 2019-01-09
Supplement: 12943_2019_939_MOESM9_ESM.pdf [file 12943_2019_939_MOESM9_ESM.pdf]

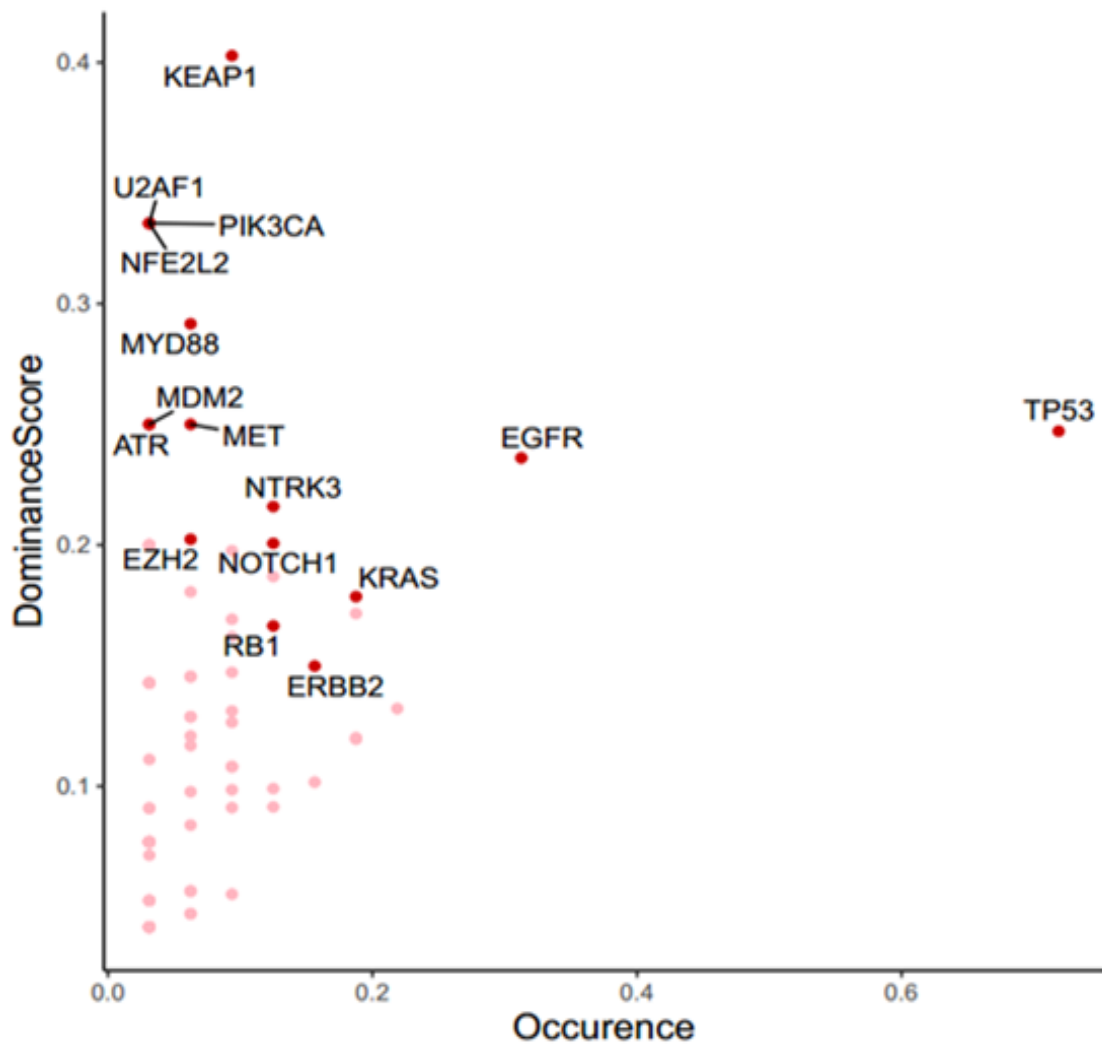

**Figure S6. Driver dominance score.**

Driver dominance score measures driver self-sufficiency for each driver gene calculated across 32 patients. It is plotted against the fraction of patients carrying the mutated driver.
